# Supplementary material for: Phase transitions of cellulose nanocrystal suspensions from nonlinear oscillatory shear
Source: Springer Nature journal article supplement (doi:10.1007/s10570-022-04474-0), 2022-02-25
Supplement: MOESM1 [file 20172270]

# Phase transitions of cellulose nanocrystal suspensions from nonlinear oscillatory shear

## Supplementary information

**Sylwia Wojno<sup>1,2</sup>, Mina Fazilati<sup>1,3,5</sup>, Tiina Nypelö<sup>2,3</sup>, Gunnar Westman<sup>2,4</sup>, Roland Kádár<sup>1,2,\*</sup>**

<sup>1</sup> Chalmers University of Technology, Department of Industrial and Materials Science, Division of Engineering Materials, SE-412 96 Gothenburg, Sweden

\*Corresponding author: roland.kadar@chalmers.se

<sup>2</sup> Wallenberg Wood Science Centre (WWSC), Chalmers University of Technology, SE-412 96 Gothenburg

<sup>3</sup> Department of Chemistry and Chemical Engineering, Division of Applied Chemistry, Chalmers University of Technology, SE-412 96 Gothenburg

<sup>4</sup> Department of Chemistry and Chemical Engineering, Division of Chemistry and Biochemistry, Chalmers University of Technology, SE-412 96 Gothenburg

<sup>5</sup> Present address: Biofilms – Research Center for Biointerfaces, Faculty of Health and Society, Malmö University, SE-205 06 Malmö

Received: date / Revised version: date

**Keywords** Cellulose nanocrystals (CNCs), CNC water suspensions, self-assembly phases, rheology, birefringence, Fourier-transform rheology, stress decomposition

### 1 *Zeta potential*

2 The Zeta potential and particle size of CNC suspensions  
 3 was measured using a Zetasizer Nano ZS (Malvern In-  
 4 struments, UK) and DTS1070 folded capillary cells. A 50  
 5 mW diode-pumped solid-state laser was used as the light  
 6 source with a wavelength of 532 nm. A CNC suspen-  
 7 sion of 0.1 wt% were analyzed in 10 mM NaCl, that was  
 8 added to obtain an accurate zeta potential value such  
 9 that the electrical double layer thickness around CNCs  
 10 is not infinite leading to stronger chiral interaction be-  
 11 tween nano-rodlike particles (Qi et al. 2015; Reid et al.  
 12 2017). All measurements were conducted at 25 °C using  
 13 stabilization time of 120 s, repeated 5 times and the av-  
 14 erage value was taken as final. The CNC particles in the  
 15 presence of 0.1 mM NaCl salt showed an average zeta  
 16 potential value  $-32.0 \pm 3.4$  mV, Tab. S1. This indicates  
 17 colloidal stability of the suspension at the macroscopic  
 18 level. Values of  $> 30$  mV have previously been reported  
 19 to indicate highly stable CNC colloids in 0.1 mM NaCl  
 20 (Bhattacharjee 2016; Patel and Agrawal 2011). In addi-  
 21 tion, similar values to the present determinations were  
 22 obtained by Shafiei-Sabet et al. (2014).

The power-law model is expressed by the equation:

$$\eta(\dot{\gamma}) = K \cdot \dot{\gamma}^{n-1} \quad (\text{S1})$$

23 where  $K$  is the consistency index and  $n$  is the flow index.

**Table S1:** Physico-chemical properties of CNC suspen-  
 sions

| Sample | $\zeta$ -potential [mV] | Conductivity [mS/cm] |
|--------|-------------------------|----------------------|
| 1      | -28.5                   | 0.0128               |
| 2      | -29.4                   | 0.0247               |
| 3      | -31.2                   | 0.0129               |
| 4      | -34.9                   | 0.0169               |
| 5      | -36.4                   | 0.0171               |

**Table S2:** Power law flow indices ( $n$ ), see equation (S1), at low [ $10^{-3}, 10^{-1}$ ] 1/s and high [ $10^0, 10^2$ ] shear rates for all non-isotropic concentrations.

| CNC [wt%] | $\dot{\gamma} \in [10^{-3}, 10^{-1}]$ | $\dot{\gamma} \in [10^0, 10^2]$ |
|-----------|---------------------------------------|---------------------------------|
| 3         | 0.33                                  | 0.24                            |
| 4         | 0.30                                  | 0.19                            |
| 5         | 0.12                                  | 0.10                            |
| 6         | 0.10                                  | 0.03                            |
| 7         | 0.07                                  | 0.03                            |
| 8         | 0.06                                  | 0.04                            |
| 9         | 0.02                                  | 0.005                           |

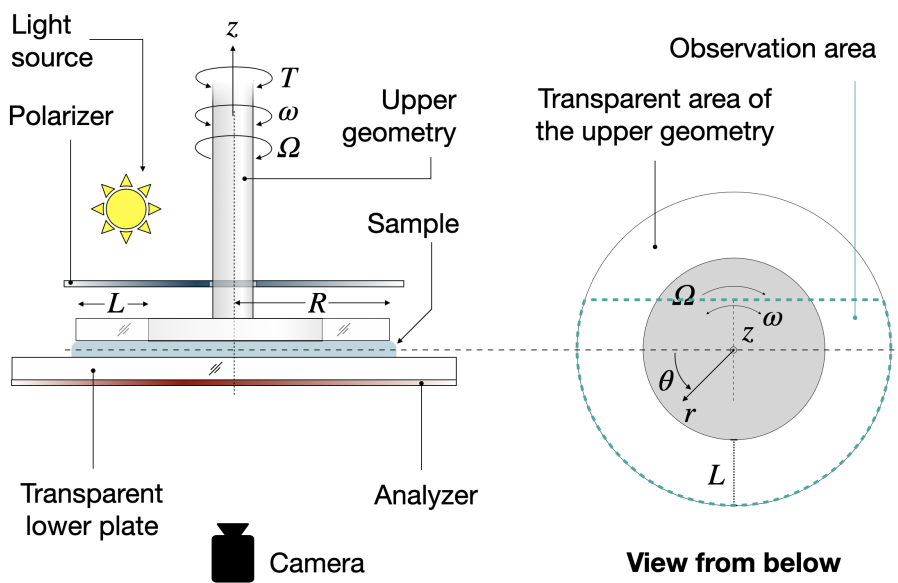

**Fig. S1:** Schematic overview of the combined rheology polarized light imaging (rheo-PLI) setup.

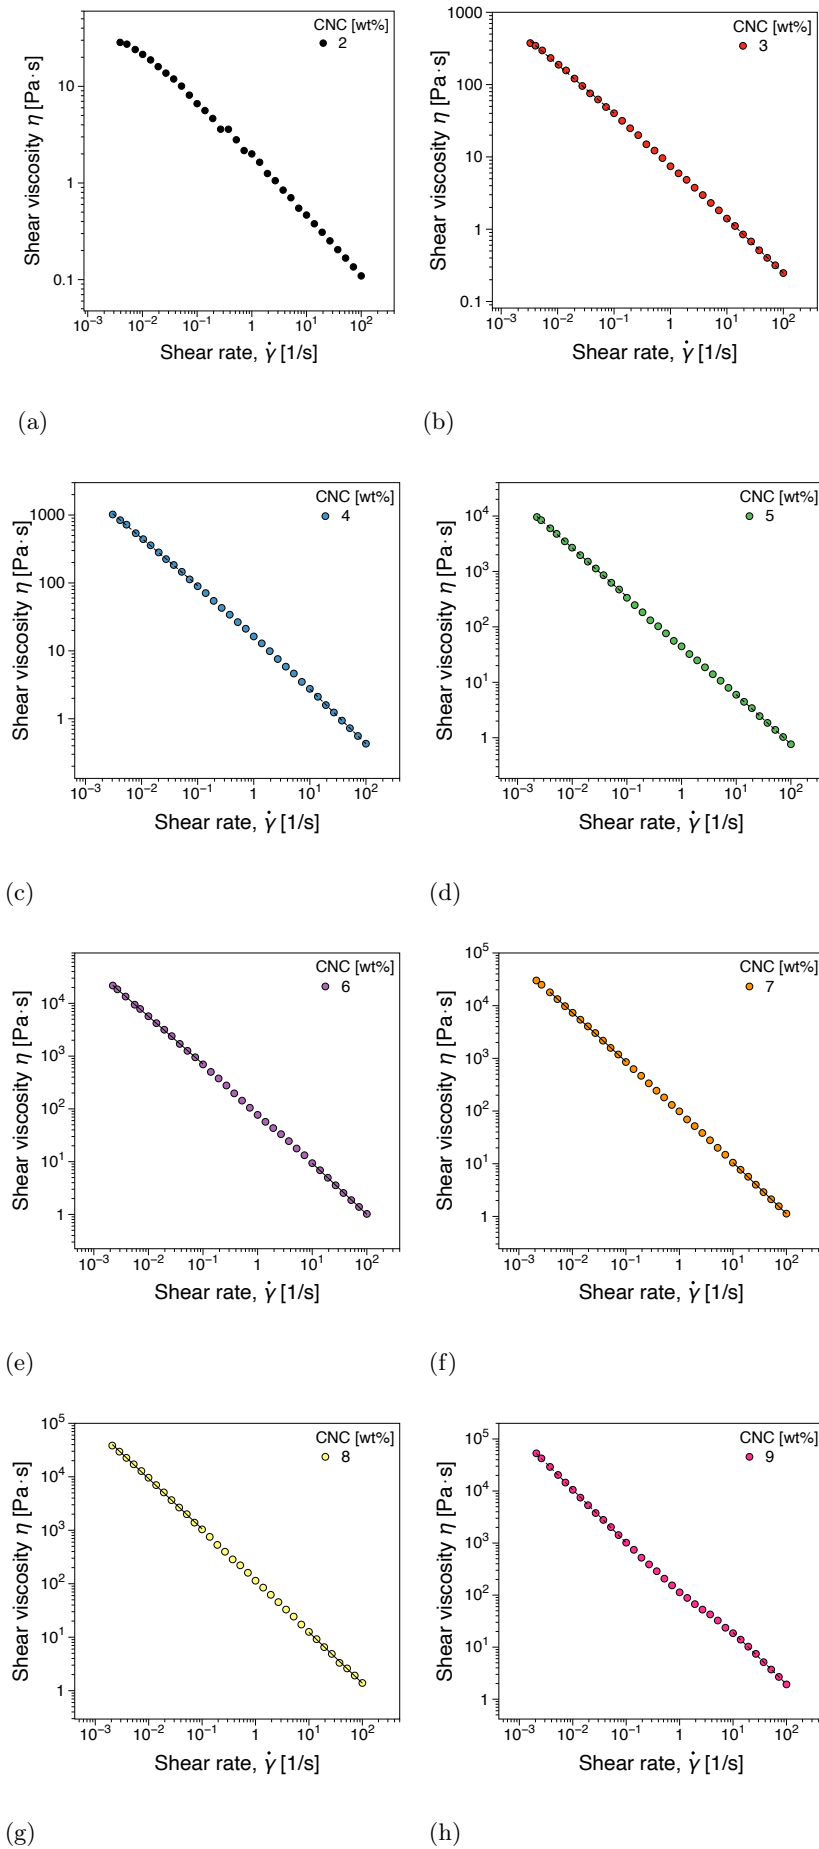

**Fig. S2:** Steady shear viscosity of the separated CNC suspensions.

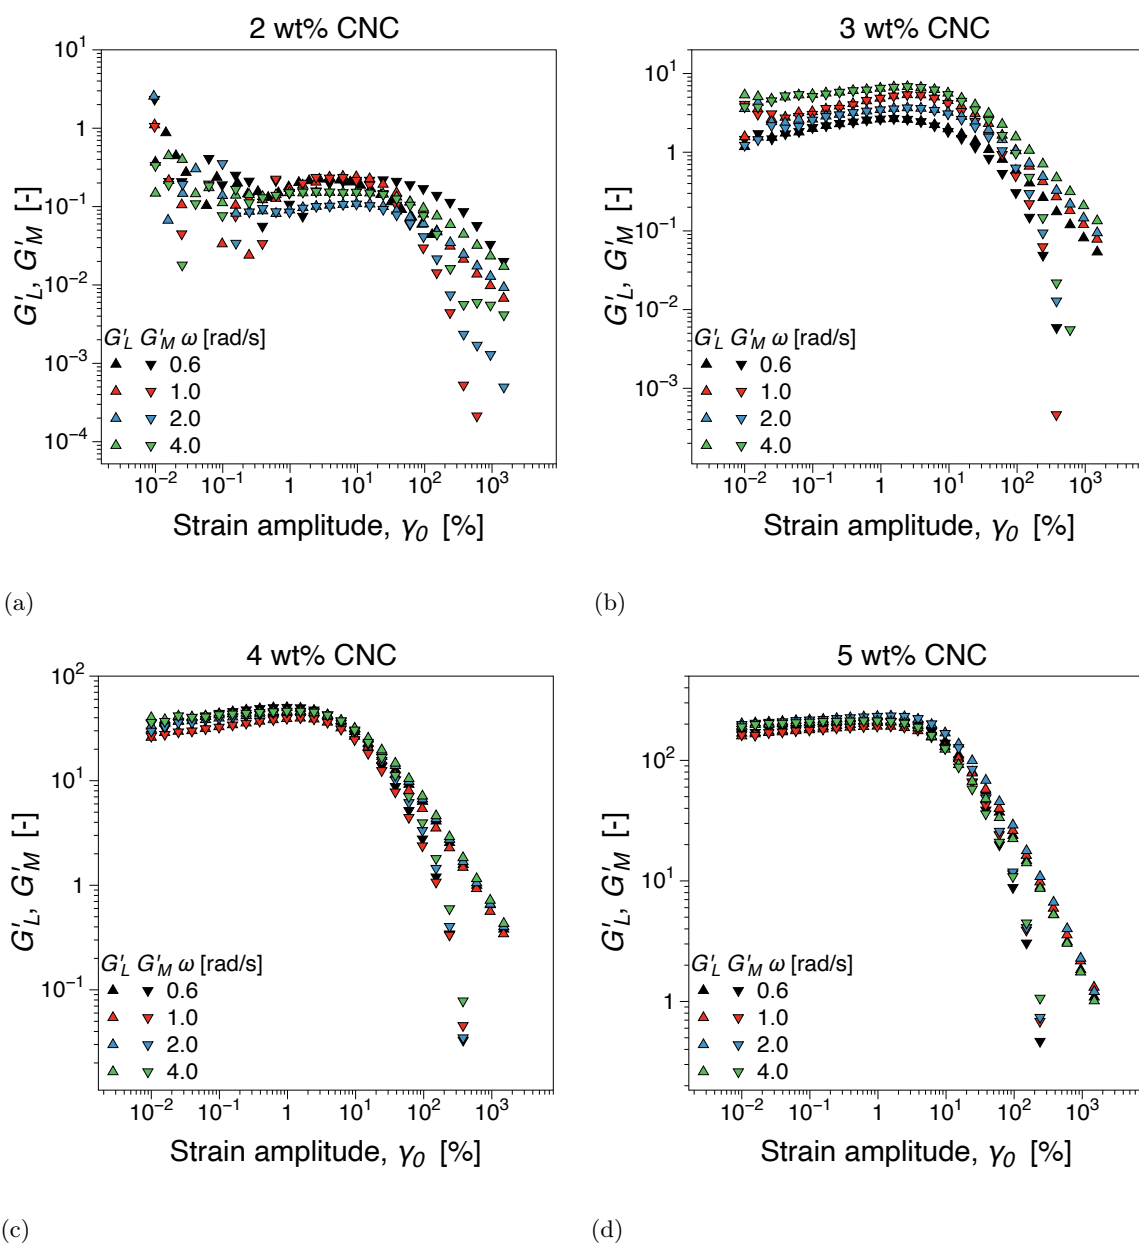

**Fig. S3:** Nonlinear viscoelastic parameters  $G'_L$ ,  $G'_M$  for: (a) 2 wt%, (b) 3 wt%, (c) 4 wt%, (d) 5 wt%, (e) 6 wt% (f) 7 wt%, (g) 8 wt% (h) 9 wt% CNC.

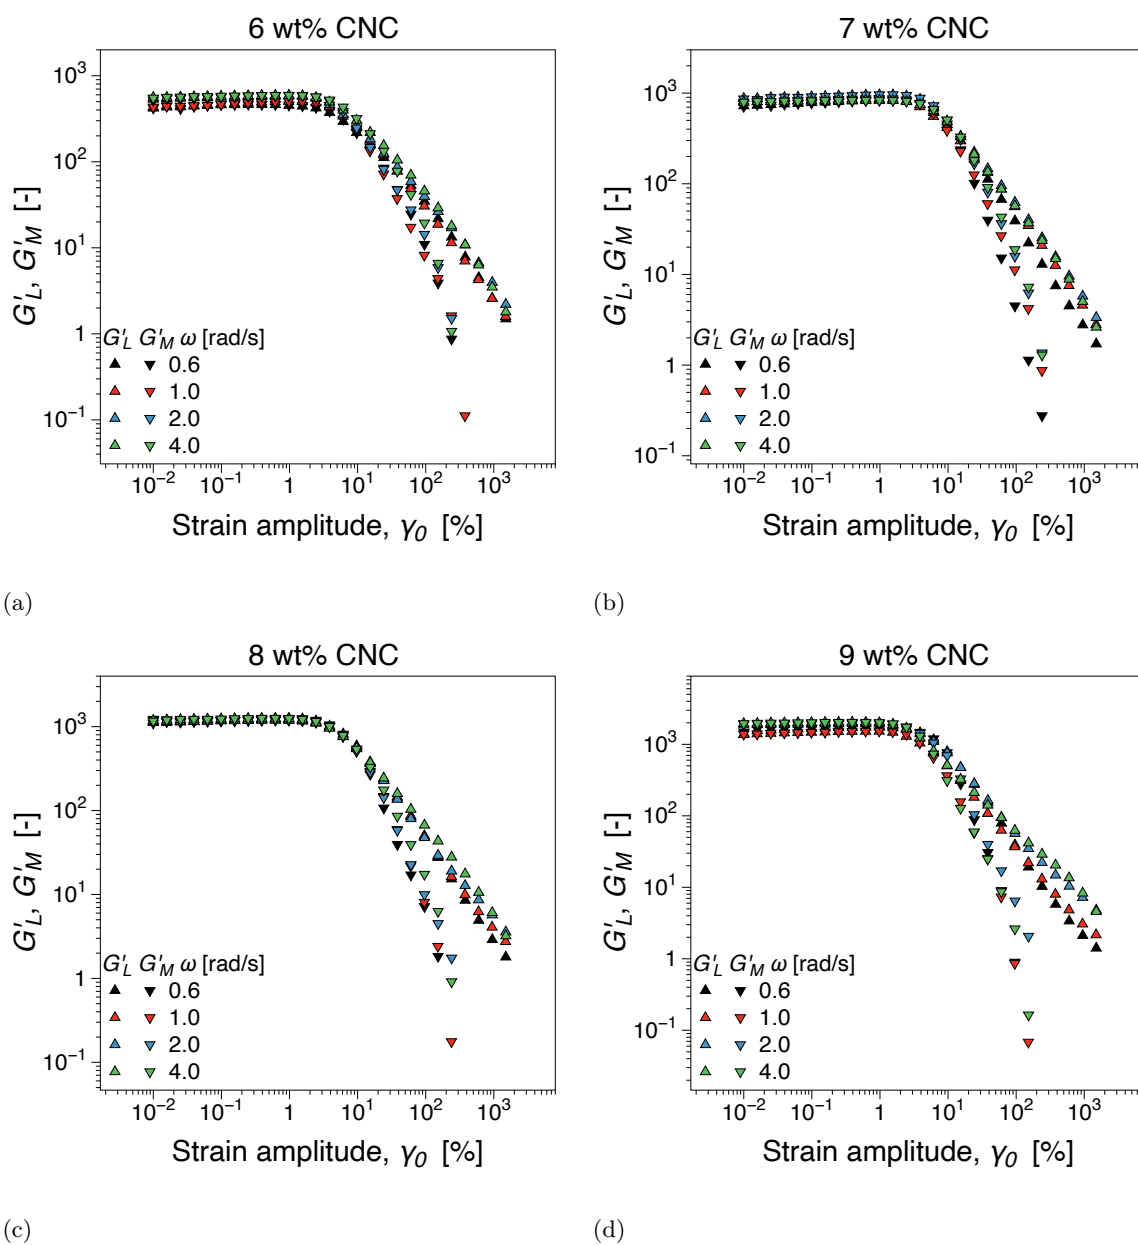

Fig. S3: (continued)

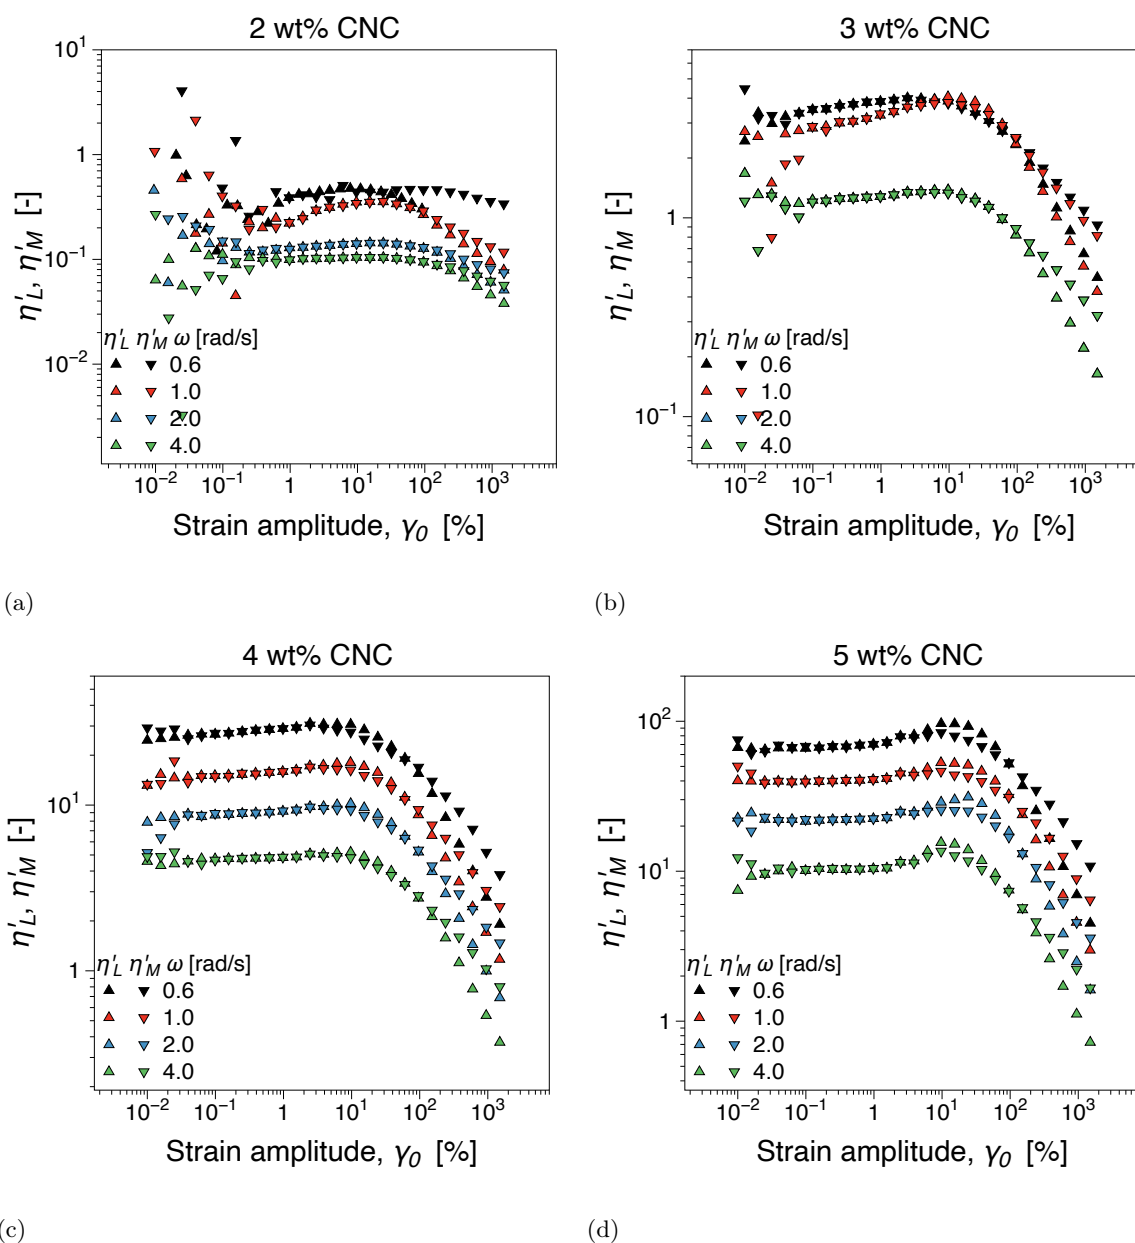

**Fig. S4:** Nonlinear viscoelastic parameters  $\eta'_L, \eta'_M$  for: (a) 2 wt%, (b) 3 wt%, (c) 4 wt%, (d) 5 wt%, (e) 6 wt% (f) 7 wt%, (g) 8 wt% (h) 9 wt% CNC.

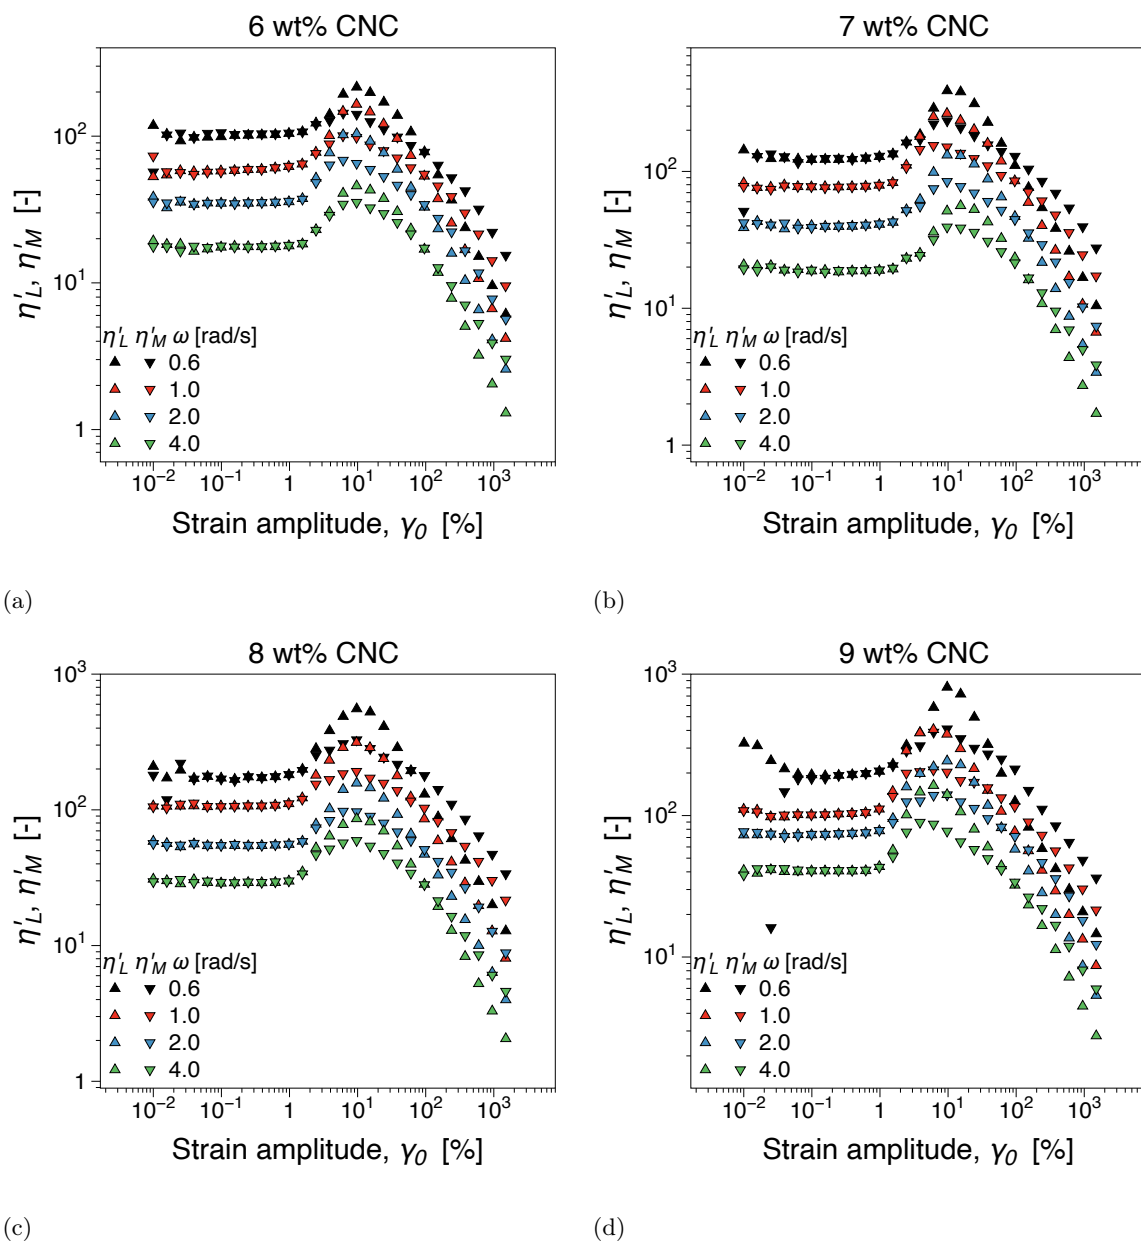

Fig. S4: (continued)



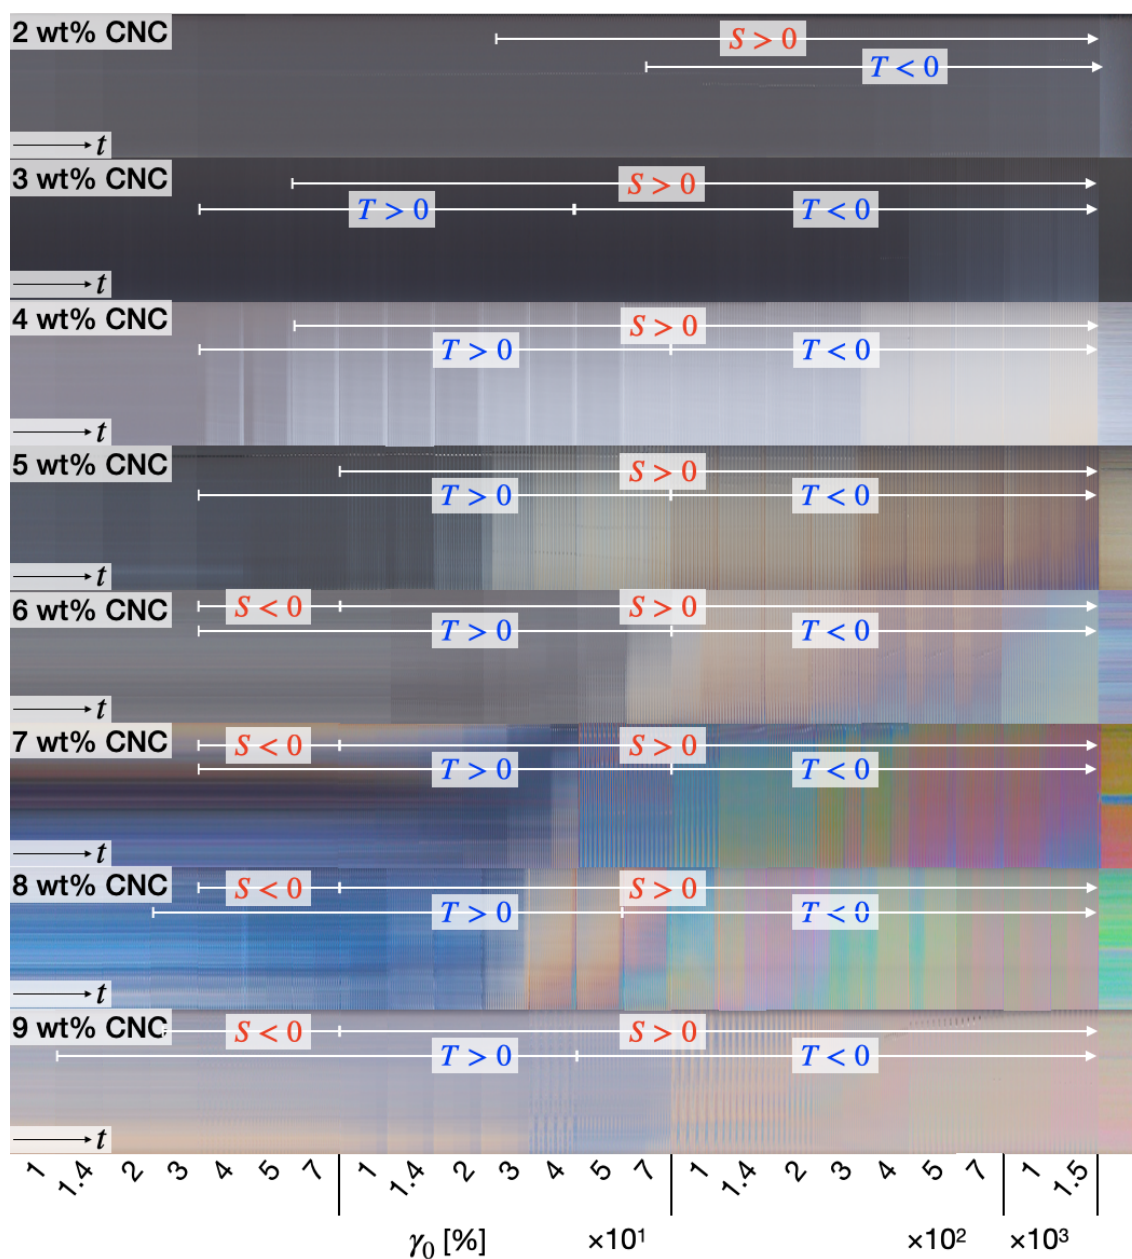

**Fig. S5:** Space-time optical visualizations of the birefringence pattern development and phase transition in strain sweep measurement at  $\omega = 4$  rad/s.

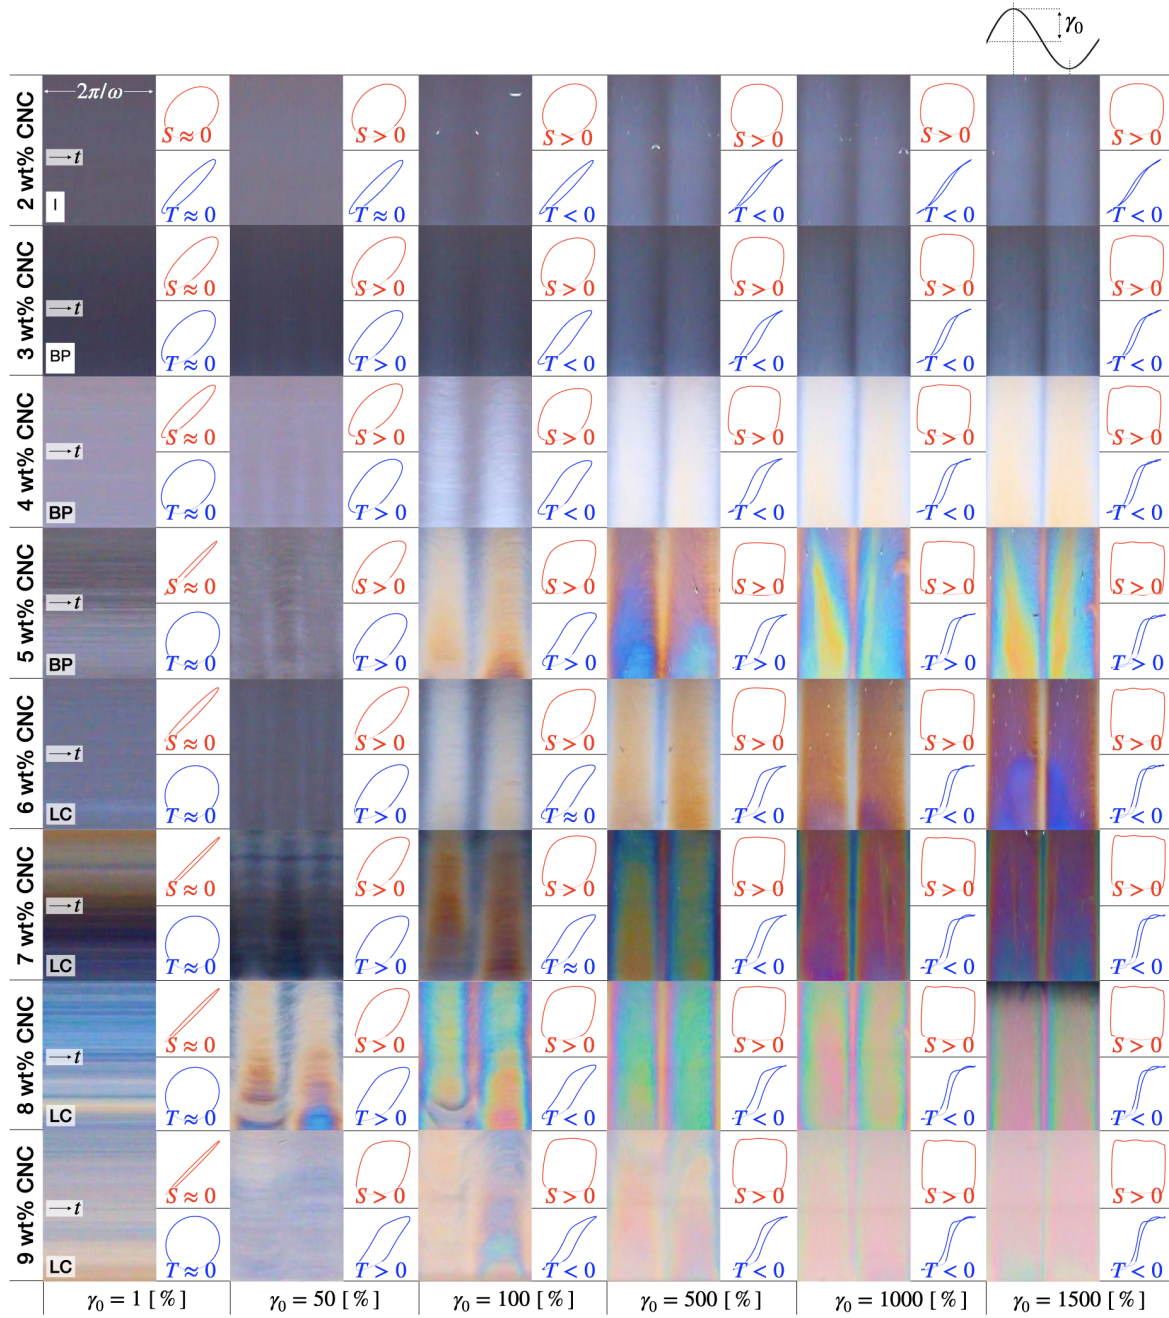

**Fig. S6:** Intra-cycle birefringence patterns strain amplitude for  $\omega = 4$  rad/s, corresponding to the space-time diagrams in Fig.3 (SI).

**Table S3:** Comparative summary of nonlinear viscoelastic parameters development depending on a phase.

| Phase     | Isotropic (I)                                                                                                                                                                                                                                                                                                                                                                                                                   | Biphasic (BP)                                                                                                                                                                                                                                                                                                                                     | Liquid crystalline (LC)                                                                                                             |
|-----------|---------------------------------------------------------------------------------------------------------------------------------------------------------------------------------------------------------------------------------------------------------------------------------------------------------------------------------------------------------------------------------------------------------------------------------|---------------------------------------------------------------------------------------------------------------------------------------------------------------------------------------------------------------------------------------------------------------------------------------------------------------------------------------------------|-------------------------------------------------------------------------------------------------------------------------------------|
| $\phi$    | 2 wt%                                                                                                                                                                                                                                                                                                                                                                                                                           | 3-5 wt%                                                                                                                                                                                                                                                                                                                                           | 6-9 wt%                                                                                                                             |
| $I_{3/1}$ | $I_{3/1} \propto \gamma_0^{n < 2}$<br>$I_{3/1} = I_{3/1}(\omega)$<br>$\omega = 0.6, 1 \text{ rad/s}$<br>i) $n \approx 1.8$ for $\gamma_0 \in [3, 9]$ %<br>ii) $n \approx 0.5$ for $\gamma_0 \in [12, 60]$ %<br>$\omega = 2 \text{ rad/s}$<br>i) $n \approx 2$ for $\gamma_0 \in [6, 23]$ %<br>ii) $n \approx 0.85$ for $\gamma_0 \in [24, 95]$ %<br>$\omega = 4 \text{ rad/s}$<br>$n \approx 1.9$ for $\gamma_0 \in [15, 95]$ % | 3 wt%<br>i) $n \approx 0.6$ for $\gamma_0 \in [1, 5]$ %<br>ii) $n \approx 1.5$ for $\gamma_0 \in [5, 10]$ %<br>4 wt%<br>i) $n \approx 1$ for $\gamma_0 \in [0.7, 3.8]$ %<br>ii) $n \approx 1.6$ for $\gamma_0 \in [3.8, 10]$ %<br>5 wt%<br>i) $n \approx 1.3$ for $\gamma_0 \in [0.95, 5]$ %<br>ii) $n \approx 1.37$ for $\gamma_0 \in [5, 10]$ % | $n \approx 2$ for $\gamma_0 \in [1, 10]$ %<br>$I_{3/1} = I_{3/1}(\omega)$                                                           |
| $S$       | $S \approx 0$ for $\gamma_0 \in [0.01, 10]$ %<br>$S > 0$ for $\gamma_0 \in [10, 1500]$ %                                                                                                                                                                                                                                                                                                                                        |                                                                                                                                                                                                                                                                                                                                                   | $S \approx 0$ for $\gamma_0 \in [0.01, 1.5]$ %<br>$S < 0$ for $\gamma_0 \in [1.5, 10]$ %<br>$S > 0$ for $\gamma_0 \in [10, 1500]$ % |
| $T$       | $T \approx 0$ for $\gamma_0 \in [0.01, 15]$ %<br>$T < 0$ for $\gamma_0 \in [15, 1500]$ %                                                                                                                                                                                                                                                                                                                                        | $T \approx 0$ for $\gamma_0 \in [0.01, 3.8]$ %<br>$T > 0$ for $\gamma_0 \in [3.8, 60]$ %<br>$T < 0$ for $\gamma_0 \in [60, 1500]$ %                                                                                                                                                                                                               |                                                                                                                                     |

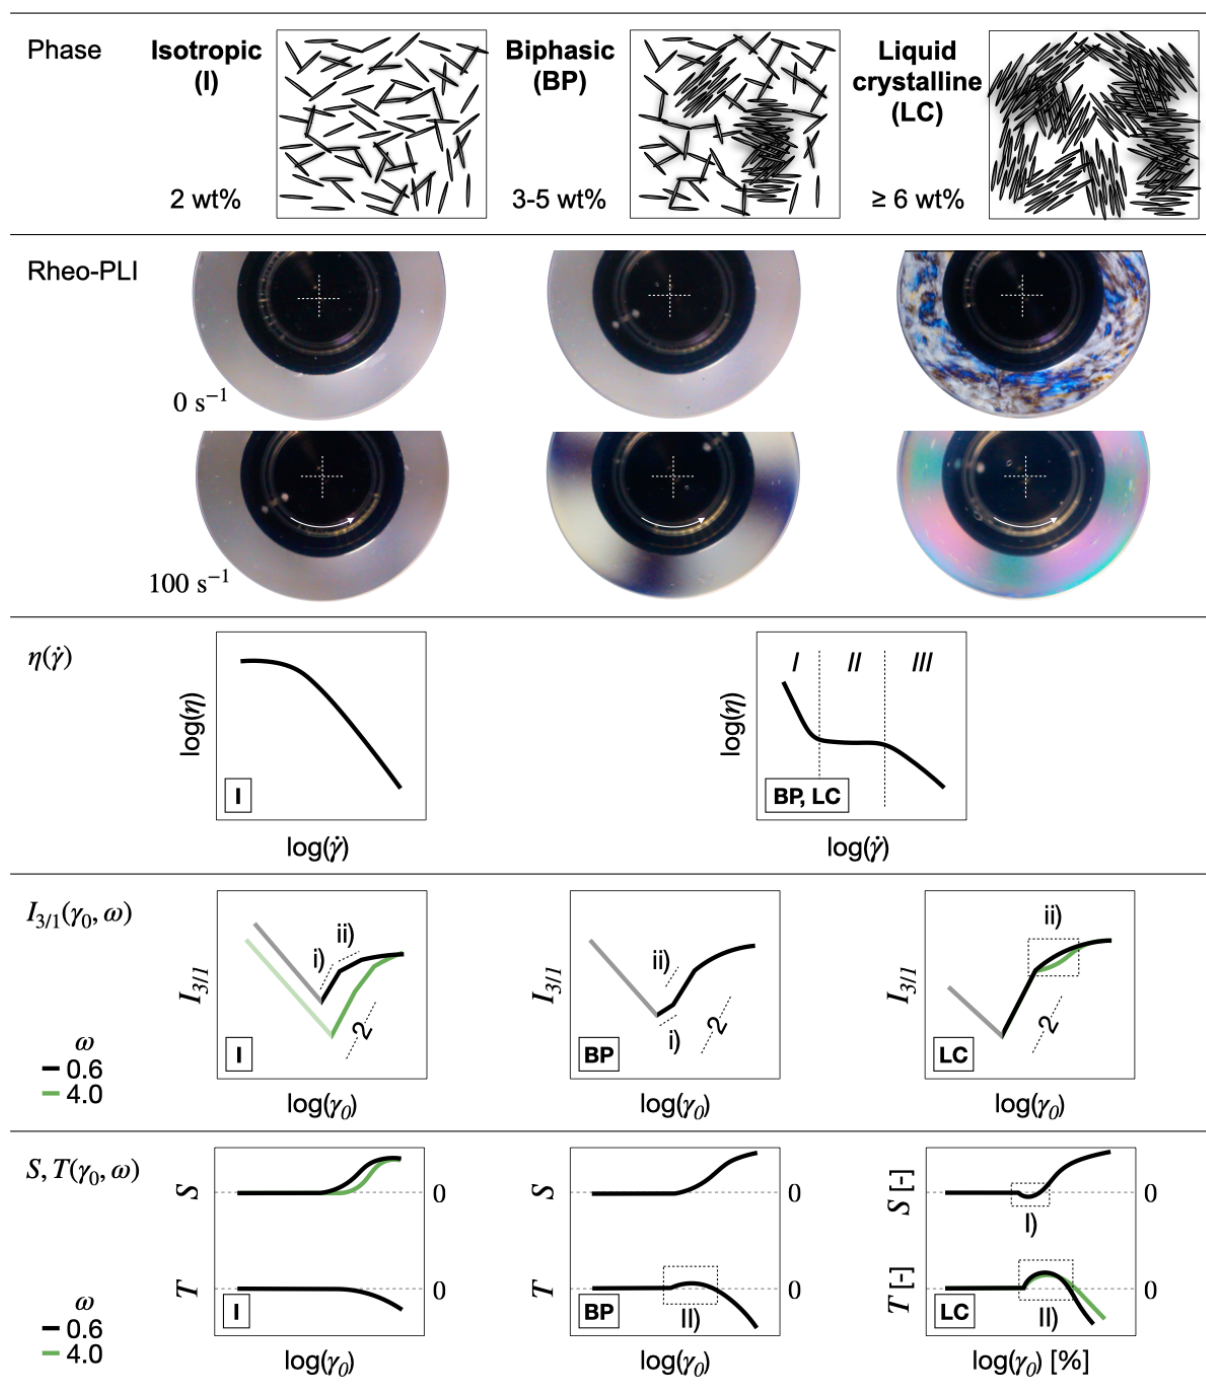

**Fig. S7:** Graphical summary of phase behavior as estimated based on PLI and rheological measurements with schematic illustrations and representative PLI.

## References

- Bhattacharjee, S. (2016). Dls and zeta potential –what they are and what they are not? *Journal of Controlled Release*, 235:337–351.
- Patel, V. R. and Agrawal, Y. K. (2011). Nanosuspension: An approach to enhance solubility of drugs. *Journal of advanced pharmaceutical technology & research*, 2(2):81–82.
- Qi, W., Xu, H.-N., and Zhang, L. (2015). The aggregation behavior of cellulose micro/nanoparticles in aqueous media. *RSC Adv*, 5:8770–8777.
- Reid, M. S., Villalobos, M., and Cranston, E. D. (2017). Benchmarking cellulose nanocrystals: From the laboratory to industrial production. *Langmuir*, 33(7):1583–1598.
- Shafiei-Sabet, S., Hamad, W. Y., and Hatzikiriakos, S. G. (2014). Ionic strength effects on the microstructure and shear rheology of cellulose nanocrystal suspensions. *Cellulose*, 21(5):3347–3359.
